# Supplementary material for: Flumequine-Mediated Upregulation of p38 MAPK and JNK Results in Melanogenesis in B16F10 Cells and Zebrafish Larvae
Source: MDPI journal article supplement (doi:10.3390/biom9100596), 2019-10-11
Supplement: s1 [file s1]

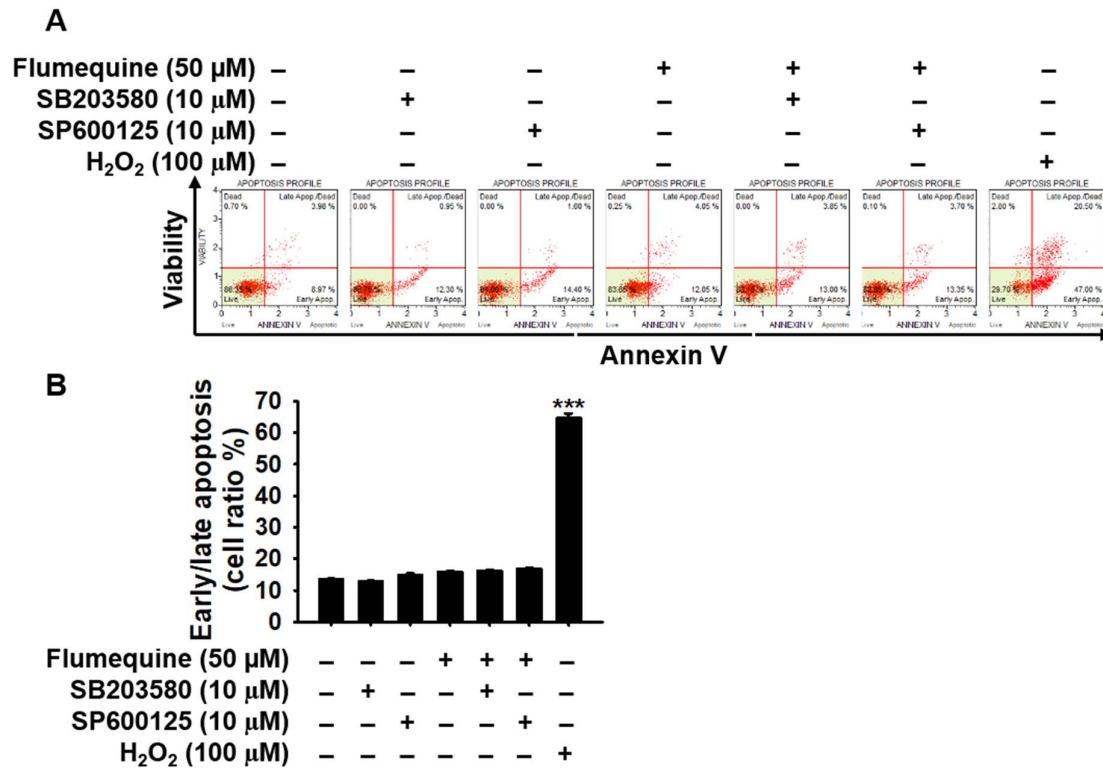

**Figure S1.** Flumequine does not induce apoptosis in the presence of SB203580 or SP600125. B16F10 cells were seeded overnight, treated with SB203580 (10  $\mu$ M) or (B) SP600125 (10  $\mu$ M) for 1 h, and then treated with flumequine (50  $\mu$ M) for 72 h. (A) The various stage of apoptosis was measured by the Muse™ Annexin V and Dead Cell assay. Early and late apoptosis was shown in right bottom and right top. (B) Total percentage of apoptosis (early/late apoptosis) was represented. H<sub>2</sub>O<sub>2</sub> was used as an apoptosis-inducing positive control. \*\*\*,  $p < 0.001$  vs. untreated control.

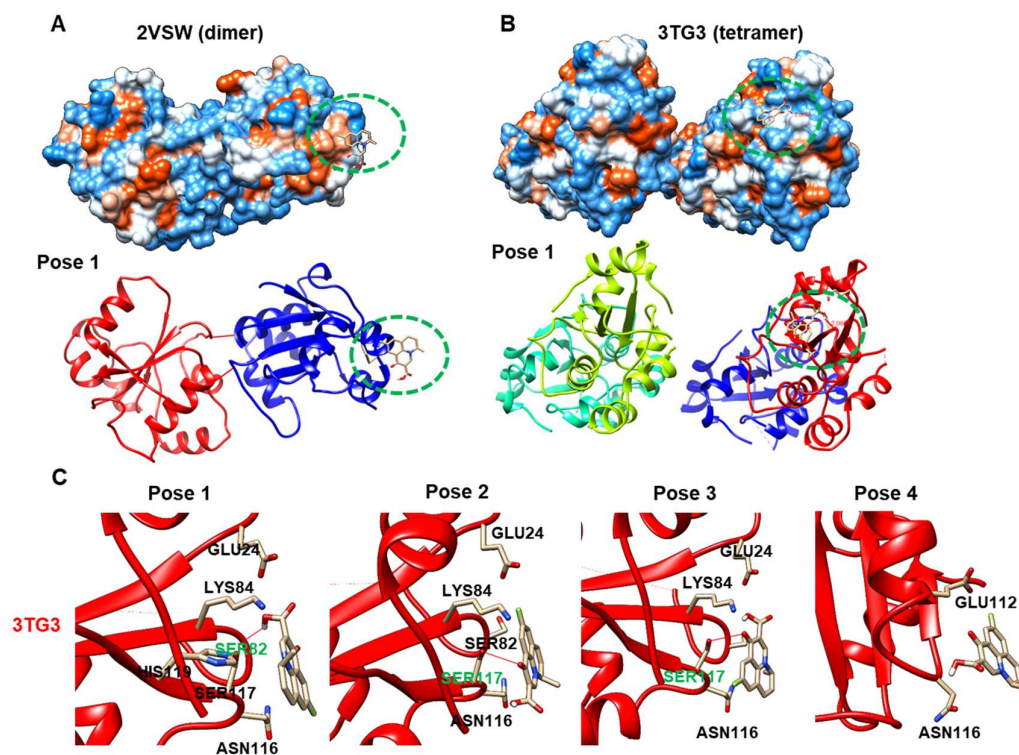

**Figure S2.** Molecular docking comparison of flumequine with DUSP16. (A) Surface structure of dimer DUSP16 (PDB: 2VSW) and (B) tetramer DUSP16 (PDB: 3TG3) binds to flumequine (top). Ribbon shape represents pose 1-binding activity, which is highest docking score (bottom). (C) Four different docking poses of tetramer DUSP16 (PDB: 3TG3) were presented.

**Table S1.** Classification of results gained from the docking of flumequine into DUSP16.

| Receptor         | Docking pose | Docking score | Binding A.A.*<br>(H-bond)** | H-bond<br>distance (Å) |
|------------------|--------------|---------------|-----------------------------|------------------------|
| DUSP16<br>(2VSW) | 1            | -1.8          | N.F.                        | N.D.                   |
|                  | 2            | -1.5          | N.F.                        | N.D.                   |
|                  | 3            | -1.2          | N.F.                        | N.D.                   |
|                  | 4            | -1.0          | N.F.                        | N.D.                   |
| DUSP16<br>(3TG3) | 1            | -3.9          | SER82                       | 2.066                  |
|                  | 2            | -3.9          | SER117                      | 3.261                  |
|                  | 3            | -3.8          | SER117                      | 3.268                  |
|                  | 4            | -3.6          | N.F.                        | N.D.                   |

\* A.A.: amino acid

\*\* H-bond: hydrogen bond

N.F.: not found

N.D.: not determined
